# Supplementary material for: Lipocalin 2 Deficiency Restrains Aging-Related Reshaping of Gut Microbiota Structure and Metabolism
Source: MDPI journal article supplement (doi:10.3390/biom11091286), 2021-08-28
Supplement: s1 [file s1]

**Figure S1**

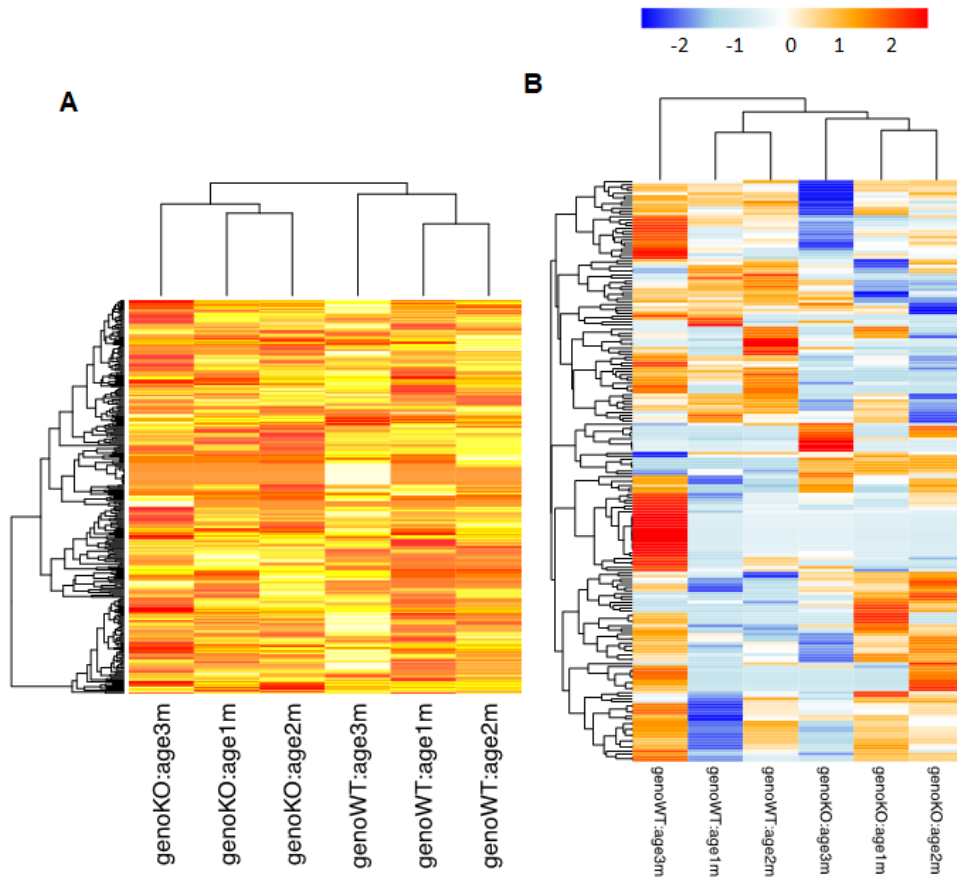

**Figure S1: Age-related gut microbiota at the ASV level in WT and LKO mice. (A)** HCA-based heatmaps on 241 ASVs that have variance > 1e-06. **(B)** HCA-based heatmaps on differentially abundant ASVs between WT and LKO mice. The increased abundances of 67 ASVs and decreased abundances of 132 ASVs were observed in LKO mice. The inputs for creating heatmap are derived from a negative binomial generalized linear model in the R environment.  $n = 6-9$ .  $q$  value  $\leq 0.05$  and  $\log_2$  scale fold change  $\geq 2$  are the criteria to determine the significance.

**Figure S2**

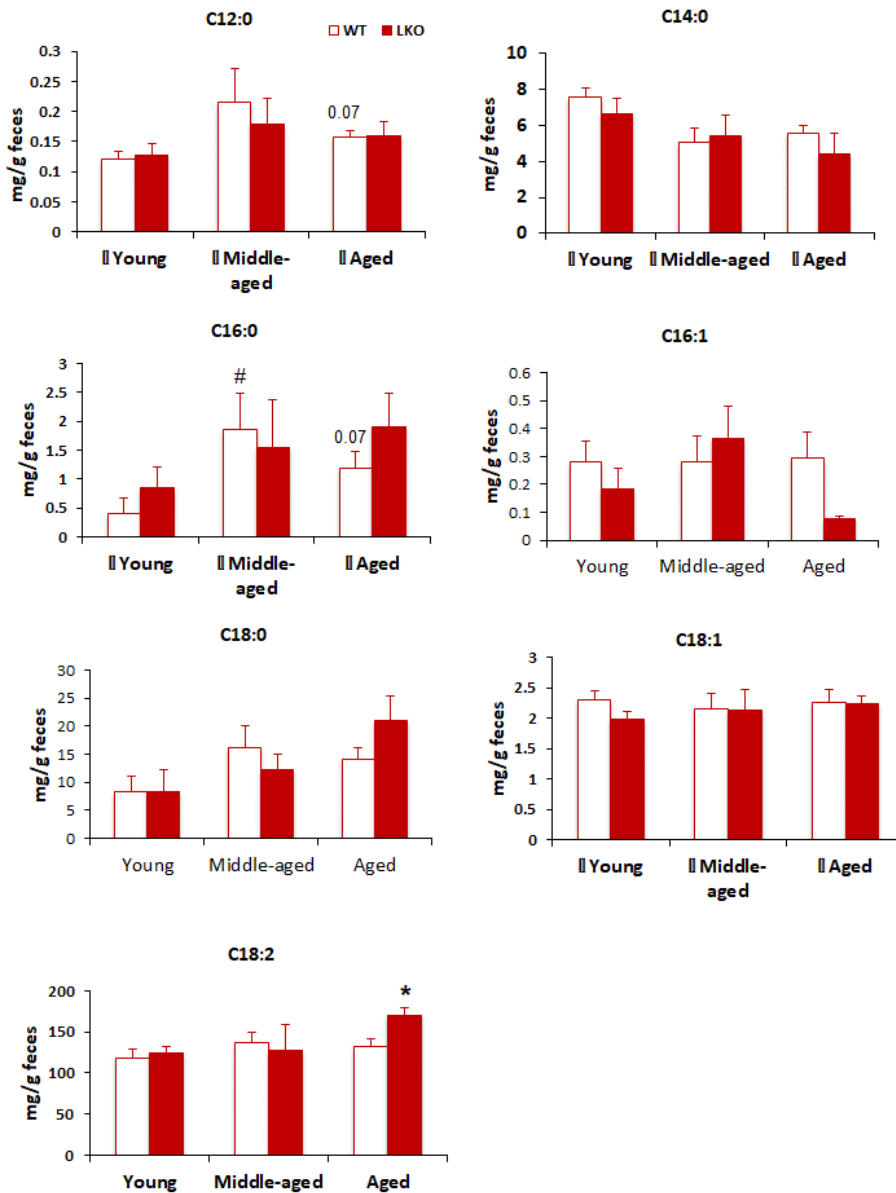

**Figure S2: Fecal LCFA levels in WT and LKO mice.** Stool samples from WT and LKO at the age of 6 months (young), 12 months (middle-aged) and 18 months (old) were homogenized in 50% ACN. Supernatants were collected for HQ reaction to detect fecal LCFA levels. Data are presented as mean  $\pm$  SEM ( $n = 6-9$ ). #  $P < 0.05$ , ##  $P < 0.01$  versus young WT mice.

**Table S1: Real-time qPCR primer sequences**

| <b>Target</b> | <b>Forward primers (5' to 3')</b> | <b>Reverse primers (5' to 3')</b> |
|---------------|-----------------------------------|-----------------------------------|
| TNF $\alpha$  | CAGAAACACAAGATGCTGGG              | CAAAAGAGGAGGCAACAAGG              |
| IL-6          | AGAAGGAGTGGCTAAGGACCAA            | AACGCACTAGGTTTGCCGAG              |
| IFN $\gamma$  | TGAACGCTACACACTGCATCT             | TGTCACCATCCTTTTGCCAGT             |
| IL-17         | AAACGTGGGGGTTTCTTAGG              | TTCAGGGTCGAGAAGATGCT              |
| Arg1          | AACACGGCAGTGGCTTTAACC             | GGTTTTCATCTGGCGCATTC              |
| IL-10         | CATGGCCCAGAAATCAAGGA              | GGAGAAATCGATGACAGCGC              |
| FFAR2         | CACAGGAAACGGGAAGCCTCG             | CTGGGGTCATTCTCCTTGGGC             |
| FFAR3         | CAGCAGAGTGCCAGTTGTCCA             | GAAGACCACCAGGGCCATCAC             |
| Tbp2          | GAAGAACAATCCAGACTAGCAGCA          | CCTTATAGGGAACTTCACATCACAG         |
